# Supplementary material for: CdSe quantum dots in a columnar matrix
Source: Royal Society of Chemistry journal article supplement (doi:10.1039/c1cc15633k), 2011-01-01
Supplement: c1cc15633k.pdf [file c1cc15633k.pdf]

## Electronic Supplementary Information

### Quantum dots insertion in columnar matrix

#### Experimental section

##### Materials:

Tri octyl phosphine (90%, technical grade) and tri octyl phosphine oxide (99%) were purchased from Sigma-Aldrich. Cadmium oxide (99%), stearic acid (99%) and selenium powder were purchased from Sisco Research Laboratories (SRL). Octadecyl amine (90%) was purchased from Acros Organics. All the solvents used in the experiments were of AR grade. All the chemicals above were used as received.

##### Synthesis of CdSe Quantum Dots:

In a typical synthesis, trioctyl phosphine-selenium (TOP-Se) stock solution was prepared by adding 0.3974 g of selenium powder to 3.7 g of TOP in a round bottom flask and the mixture was heated to 150°C under argon flow to obtain a clear solution. In another flask, 0.225 g of cadmium oxide (CdO) and 4 g of stearic acid were heated to 150°C under argon flow. Once CdO was dissolved, the solution was cooled to room temperature. 8 g of trioctyl phosphine oxide (TOPO), 3.18 g of octadecyl amine were subsequently added and heated to 150°C. At this temperature, 2ml of TOP-Se stock solution was swiftly injected into the Cd solution to induce the growth of quantum dots. Two different sizes of quantum dots were obtained by maintaining the temperature of reaction mixture at 120°C and 130°C for 30 min respectively in two different batches. The reaction mixture was added to toluene, to terminate further reaction. Methanol was subsequently added to the toluene dispersion for crashing out QDs. The excess reaction

precursors and capping agents were removed by repeated washing with methanol and dispersing in toluene, the purified QDs were collected after centrifugation. As synthesised QDs are readily dispersible in common organic solvents such as toluene, hexane, chloroform, DCM etc.

**Table S1** Phase transition temperatures (peak, °C) and associated enthalpy changes (kcal mol<sup>-1</sup>, in parentheses) of CdSe QD-DLC composites. Cr = crystal, Cr1= modified crystal, Col<sub>p</sub> = columnar plastic phase, Col<sub>h</sub> = hexagonal columnar mesophase, I = isotropic phase

| Composite | Heating scan                                | Cooling scan                                             |
|-----------|---------------------------------------------|----------------------------------------------------------|
| H4TP      | Cr 89(37) col <sub>p</sub> 146(31)I         | I 144 (30) col <sub>h</sub> 79.6(3.5) Cr 67(15) Cr1      |
| 3a        | Cr 92.4 (39) col <sub>h</sub> 145.0(25) I   | I 143 (25) col <sub>h</sub> 80.6(4) Cr 61.5 (30) Cr1     |
| 3b        | Cr 92 (40) col <sub>h</sub> 143.9(22) I     | I 142.1 (22) col <sub>h</sub> 80.5(5) Cr 62.9 (31) Cr1   |
| 3c        | Cr 92 (41) col <sub>h</sub> 143.2(22) I     | I 140.7 (22) col <sub>h</sub> 80.7(7) Cr 63.2 (31) Cr1   |
| 3d        | Cr 91.1 (41) col <sub>h</sub> 141.9(21) I   | I 140.4 (20) col <sub>h</sub> 80.6(8) Cr 63 (30) Cr1     |
| 4a        | Cr 90.2 (37) col <sub>h</sub> 145(26) I     | I 142.7 (25) col <sub>h</sub> 79.7(4) Cr 62.2 (32) Cr1   |
| 4b        | Cr 90.1 (37.8) col <sub>h</sub> 144.4(23) I | I 142.4 (20.3) col <sub>h</sub> 79.8(4) Cr 61.4 (31) Cr1 |
| 4c        | Cr 91.6 (39.8) col <sub>h</sub> 143.2(22) I | I 141.5 (21.8) col <sub>h</sub> 79.7(5) Cr 60.6 (31) Cr1 |
| 4d        | Cr 89.9 (39.9) col <sub>h</sub> 142.3(22) I | I 140.9 (19.9) col <sub>h</sub> 79.7(5) Cr 62.3 (31) Cr1 |

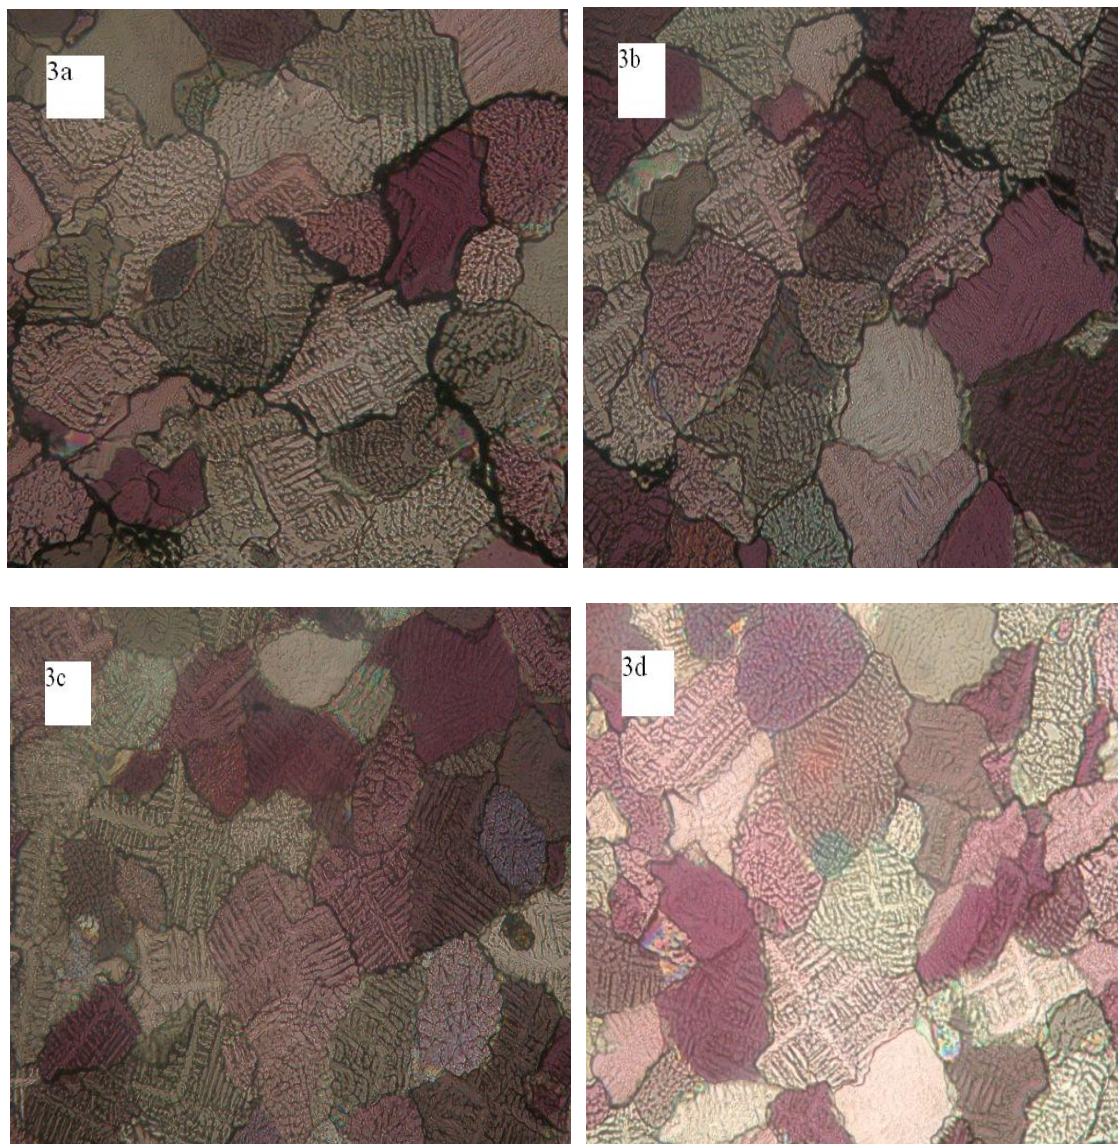

**Figure S1.** POM images of the columnar phase of 3a-d series composites at 120° C (crossed polarizer, 200 x magnification).

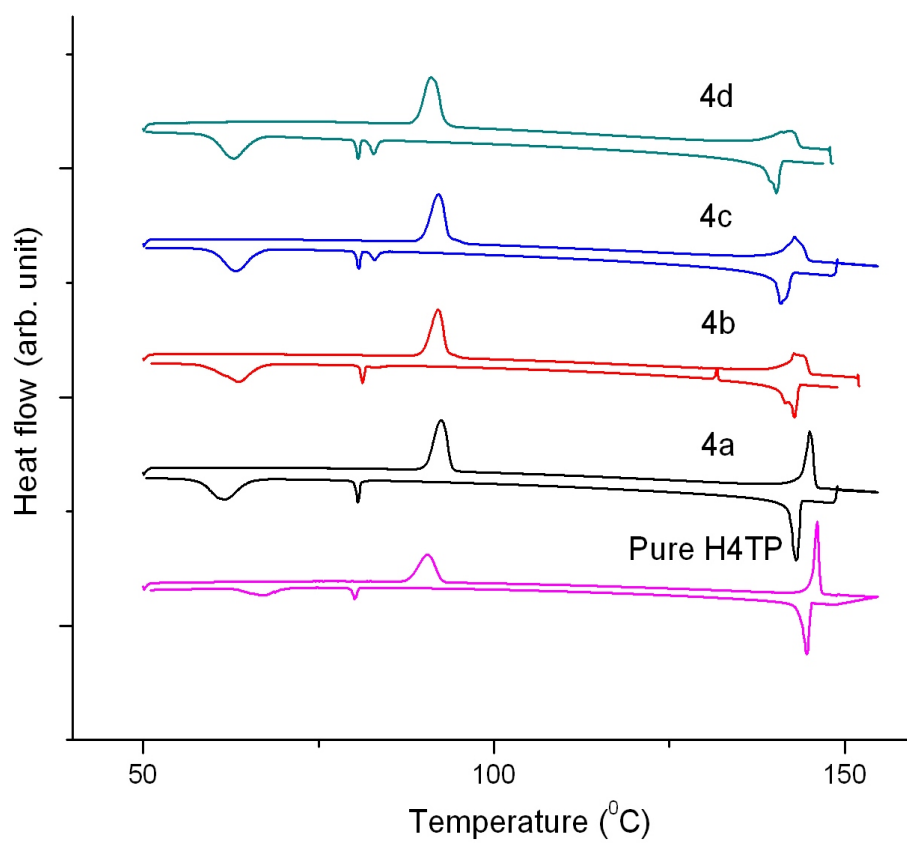

**Figure S2.** DSC thermogram of 4a-d composites on heating and cooling (scan rate 5 °C min<sup>-1</sup>)

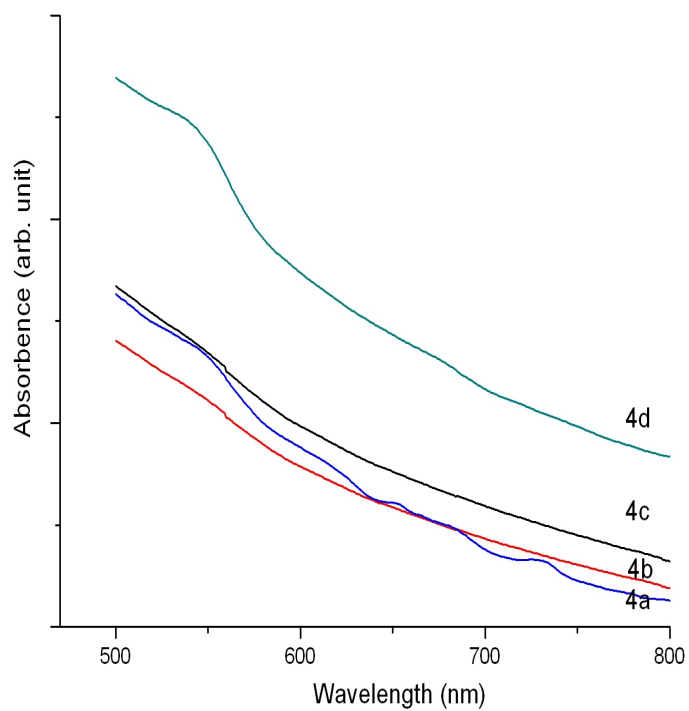

Fig S3. Absorption spectra of composites 4a-4d.

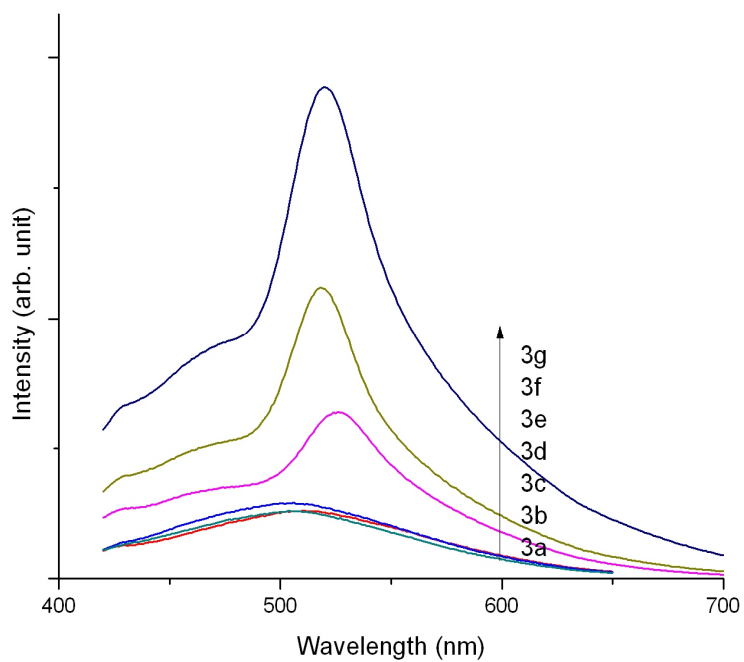

Fig S4. Photoluminescence spectra of composites 3a-3d.

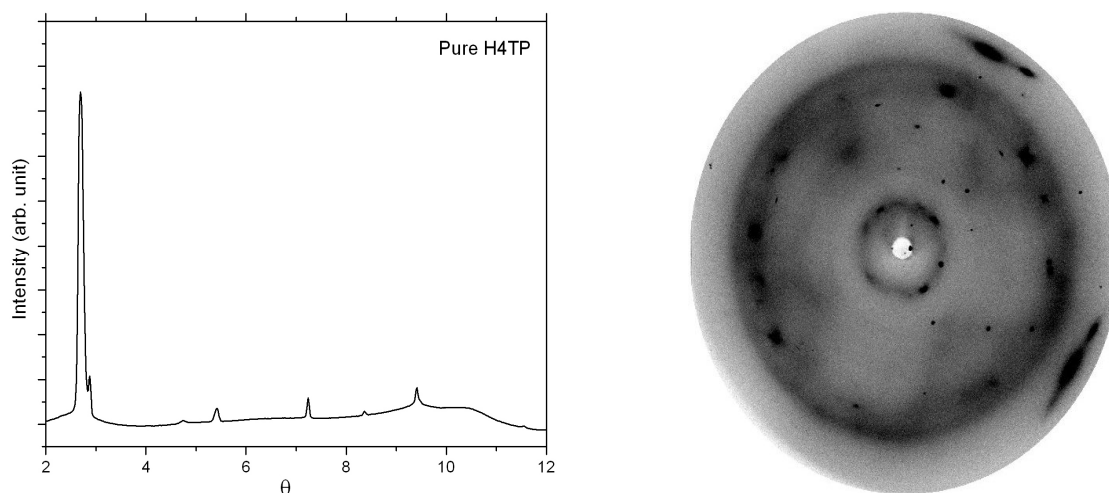

**Fig S5.** One dimensional intensity Vs  $\theta$  and XRD pattern of pure H4TP.

XRD details: Diffraction patterns were obtained using Cu K $\alpha$  (0.154 nm) radiation from a rotating anode X-ray generator (Rigaku, UltraX 18) operating at 50 kV and 80 mA. Data were collected using a 2D image plate detector (Marresearch). Exposures lasted for 1-2 h. Typical instrumental resolution [full width at half-maximum (fwhm)] was 0.18 nm<sup>-1</sup>. Spacings of the sharp peaks in the diffraction pattern could be measured to an accuracy of 0.03 nm, whereas the corresponding quantity for the diffuse peaks was 0.1 nm.
